# Supplementary material for: Efficient dye degradation and THz spectra of {PMo12} based rare earth phosphine oxide complexes
Source: Royal Society of Chemistry journal article supplement (doi:10.1039/d2ce00989g), 2022-01-01
Supplement: d2ce00989g1.pdf [file d2ce00989g1.pdf]

## Support information for

# Efficient dye degradation and THz spectra of {PMo<sub>12</sub>} based rare earth phosphine oxide complexes

Cong Hu <sup>a</sup>, Ying-Yu Li <sup>a</sup>, Qi-Ming Qiu <sup>b</sup>, Hong-Liang Han <sup>a</sup>, Chao-Yue Gu <sup>a</sup>, Yu-Ping Yang <sup>c</sup> Li-Xiong Dai <sup>\*d</sup> and Qiong-Hua Jin <sup>\*a, e</sup>

<sup>a</sup> Department of Chemistry, Capital Normal University, Beijing, 100048, China

<sup>b</sup> School of science, China University of Geosciences, Beijing, 100083, China

<sup>c</sup> School of Science, Minzu University of China, Beijing, 100081, China

<sup>d</sup> Wenzhou Institute, University of Chinese Academy of Sciences, Wenzhou, 325000, China

<sup>e</sup> State Key Laboratory of Structural Chemistry, Fujian Institute of Research on the Structure of Matter, Chinese Academy of Sciences, Fuzhou, Fujian, 350002, PR China

### Caption of Figure

Fig S1. Powder X-ray diffraction of complex **1**

Fig S2. Powder X-ray diffraction of complex **2**

Fig S3. Powder X-ray diffraction of complex **3**

Fig S4. Powder X-ray diffraction of complex **4**

Fig S5. Powder X-ray diffraction of complex **5**

Fig S6. Powder X-ray diffraction of complex **6**

Fig S7. Powder X-ray diffraction of complex **7**

Fig S8. Powder X-ray diffraction of complex **8**

Fig S9. Powder X-ray diffraction of complex **9**

Fig S10. Powder X-ray diffraction of complex **10**

Fig. S11. The IR spectra for H<sub>3</sub>PMo<sub>12</sub>O<sub>40</sub>

Fig. S12. The IR spectra for complex **1**

Fig. S13. The IR spectra for complex **2**

Fig. S14. The IR spectra for complex **3**

Fig. S15. The IR spectra for complex **4**

Fig. S16. The IR spectra for complex **5**

Fig. S17. The IR spectra for complex **6**

Fig. S18. The IR spectra for complex **7**

Fig. S19. The IR spectra for complex **8**

Fig. S20. The IR spectra for complex **9**

Fig. S21. The IR spectra for complex **10**

Fig. S22. Adsorption efficiency of RhB at different time intervals by complex **1**. (inset: Typical absorption spectra of RhB solution at different time intervals.)

Fig. S23. Adsorption efficiency of RhB at different time intervals by complex **2**. (inset: Typical absorption spectra of RhB solution at different time intervals.)

Fig. S24. Adsorption efficiency of RhB at different time intervals by complex **4**. (inset: Typical absorption spectra of RhB solution at different time intervals.)

Fig. S25. Adsorption efficiency of RhB at different time intervals by complex **5**. (inset: Typical absorption spectra of

RhB solution at different time intervals.)

Fig. S26. Adsorption efficiency of RhB at different time intervals by complex **6**. (inset: Typical absorption spectra of RhB solution at different time intervals.)

Fig. S27. Adsorption efficiency of RhB at different time intervals by complex **7**. (inset: Typical absorption spectra of RhB solution at different time intervals.)

Fig. S28. Adsorption efficiency of RhB at different time intervals by complex **8**. (inset: Typical absorption spectra of RhB solution at different time intervals.)

Fig. S29. Adsorption efficiency of RhB at different time intervals by complex **10**. (inset: Typical absorption spectra of RhB solution at different time intervals.)

Fig. S30. PXRD of complex **3** before and after adsorption experiments.

Fig. S31. Adsorption effect of MB by complexes **1-10** after stirring for 30 minutes in the dark.

Fig. S32. Removal efficiency of MB in the photocatalytic experiment by complex **2**. (inset: UV-visible absorption spectral changes observed for the MB solution under UV light irradiation)

Fig. S33. Removal efficiency of MB in the photocatalytic experiment by complex **3**. (inset: UV-visible absorption spectral changes observed for the MB solution under UV light irradiation)

Fig. S34. Removal efficiency of MB in the photocatalytic experiment by complex **4**. (inset: UV-visible absorption spectral changes observed for the MB solution under UV light irradiation)

Fig. S35. Removal efficiency of MB in the photocatalytic experiment by complex **5**. (inset: UV-visible absorption spectral changes observed for the MB solution under UV light irradiation)

Fig. S36. Removal efficiency of MB in the photocatalytic experiment by complex **6**. (inset: UV-visible absorption spectral changes observed for the MB solution under UV light irradiation)

Fig. S37. Removal efficiency of MB in the photocatalytic experiment by complex **7**. (inset: UV-visible absorption spectral changes observed for the MB solution under UV light irradiation)

Fig. S38. Removal efficiency of MB in the photocatalytic experiment by complex **9**. (inset: UV-visible absorption spectral changes observed for the MB solution under UV light irradiation)

Fig. S39. Removal efficiency of MB in the photocatalytic experiment by complex **10**. (inset: UV-visible absorption spectral changes observed for the MB solution under UV light irradiation)

Fig. S40. The photocatalytic degradation removal rates of MB by complex **1** for 5 cycles under the same conditions.

Fig. S41. PXRD of complex **1** before and after five cycles of photocatalytic experiment.

#### **Caption of Table**

Table S1. Selected bond lengths(Å) and bond angles(°) for complexes **1-10**.

Table S2. Weak interactions in the stacking structure of complex **1**

Table S3. Weak interactions in the stacking structure of complex **2**

Table S4. Weak interactions in the stacking structure of complex **3**

Table S5. Weak interactions in the stacking structure of complex **4**

Table S6. Weak interactions in the stacking structure of complex **5**

Table S7. Weak interactions in the stacking structure of complex **6**

Table S8. Weak interactions in the stacking structure of complex **7**

Table S9. Weak interactions in the stacking structure of complex **8**

Table S10. Weak interactions in the stacking structure of complex **9**

Table S11. Weak interactions in the stacking structure of complex **10**

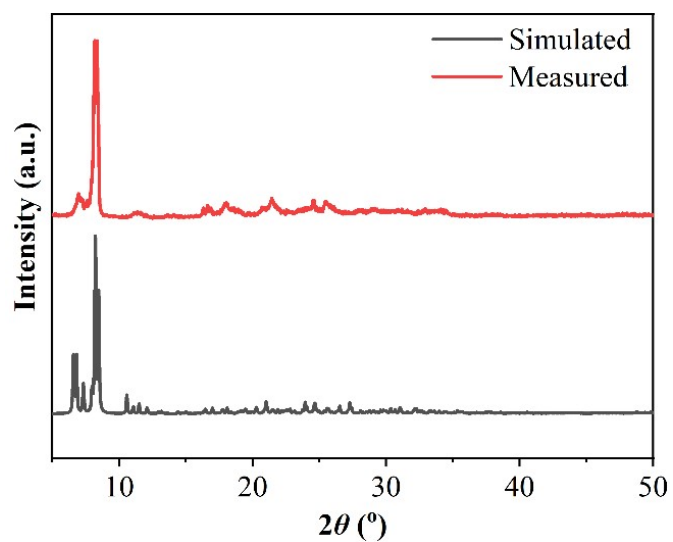

Fig S1. Powder X-ray diffraction of complex 1

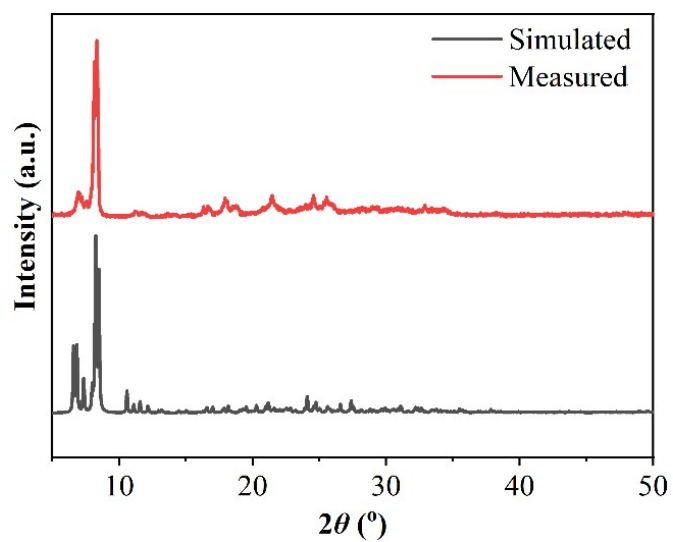

Fig S2. Powder X-ray diffraction of complex 2

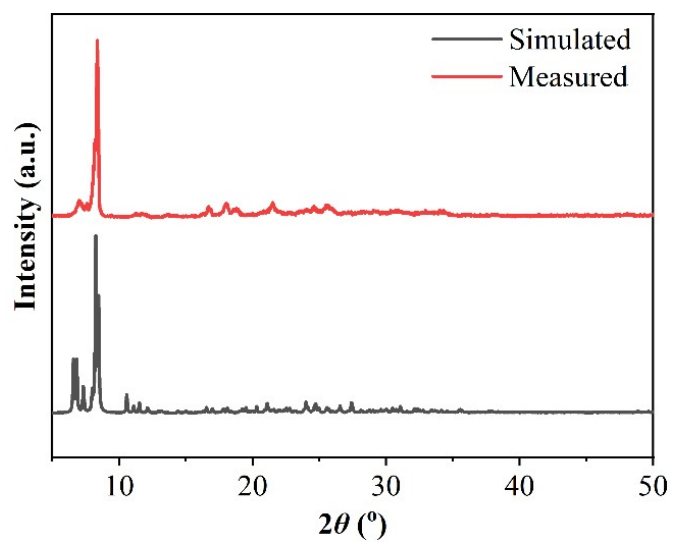

Fig S3. Powder X-ray diffraction of complex 3

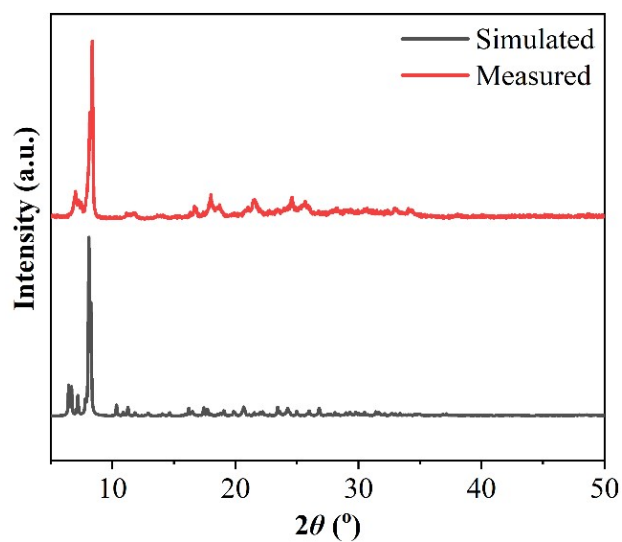

Fig S4. Powder X-ray diffraction of complex 4

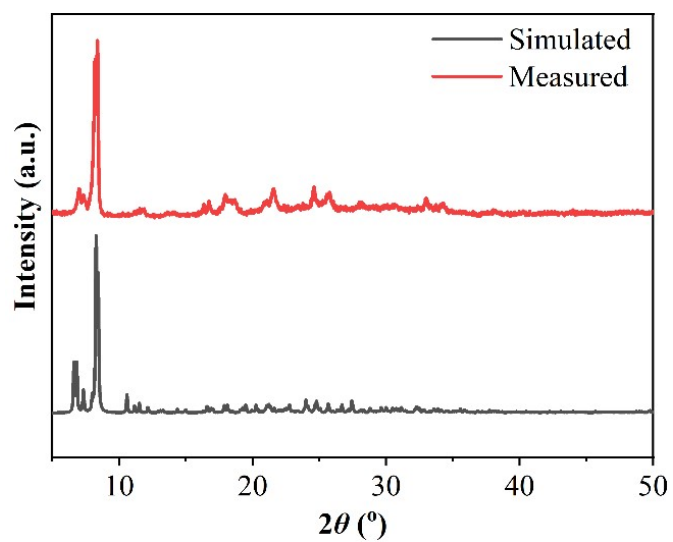

Fig S5. Powder X-ray diffraction of complex 5

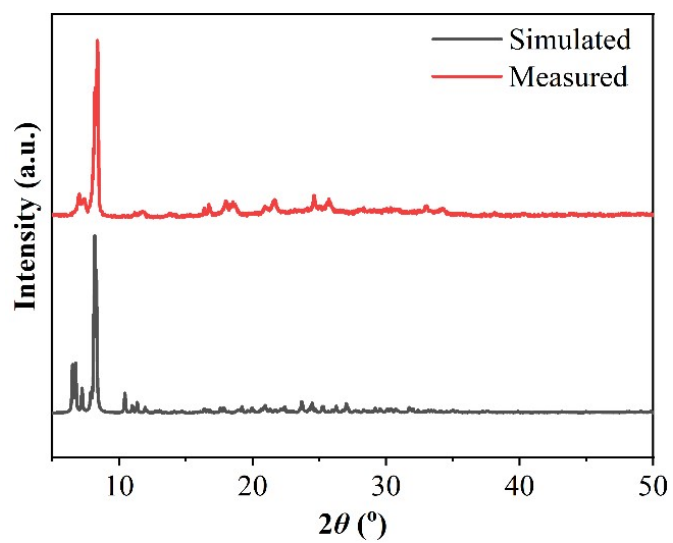

Fig S6. Powder X-ray diffraction of complex 6

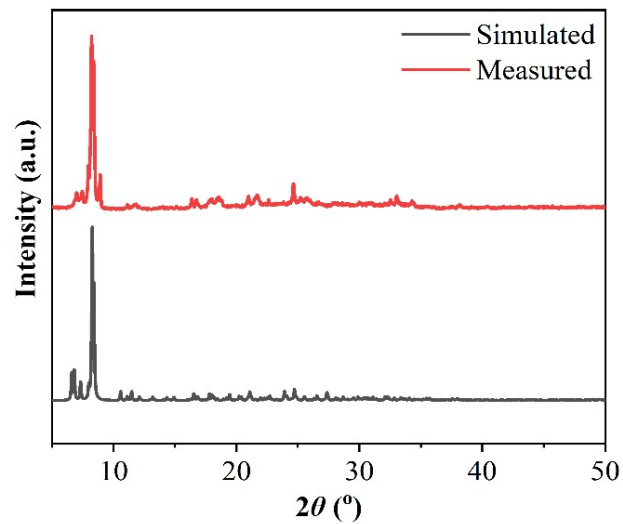

Fig S7. Powder X-ray diffraction of complex 7

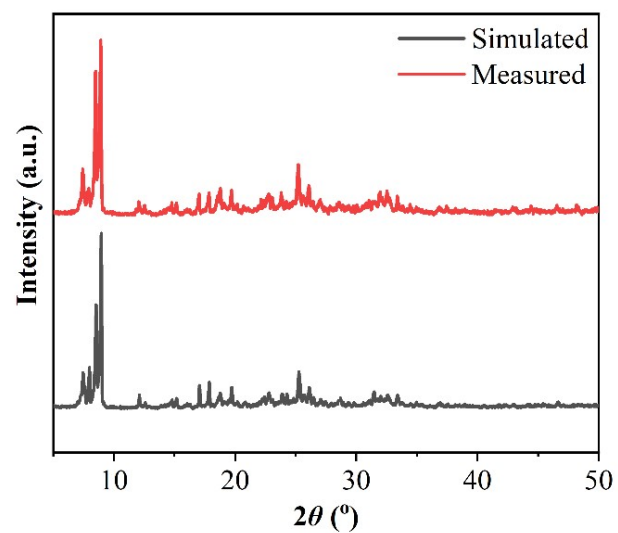

Fig S8. Powder X-ray diffraction of complex 8

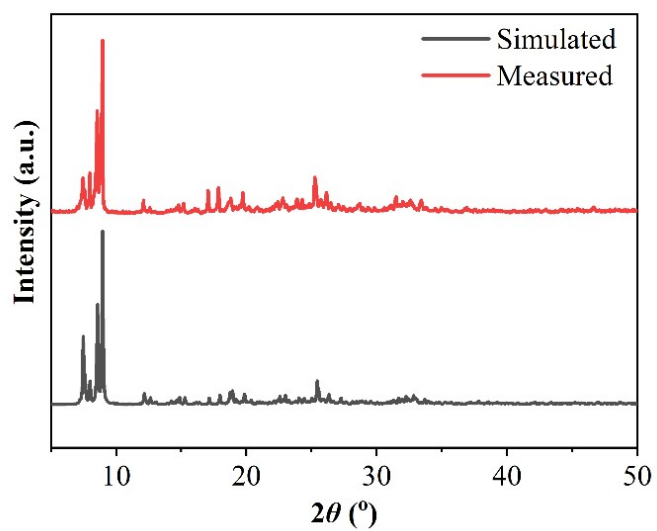

Fig S9. Powder X-ray diffraction of complex 9

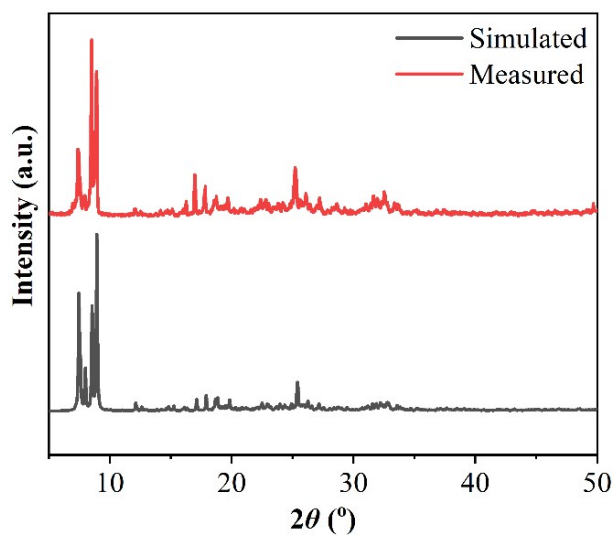

Fig S10. Powder X-ray diffraction of complex **10**

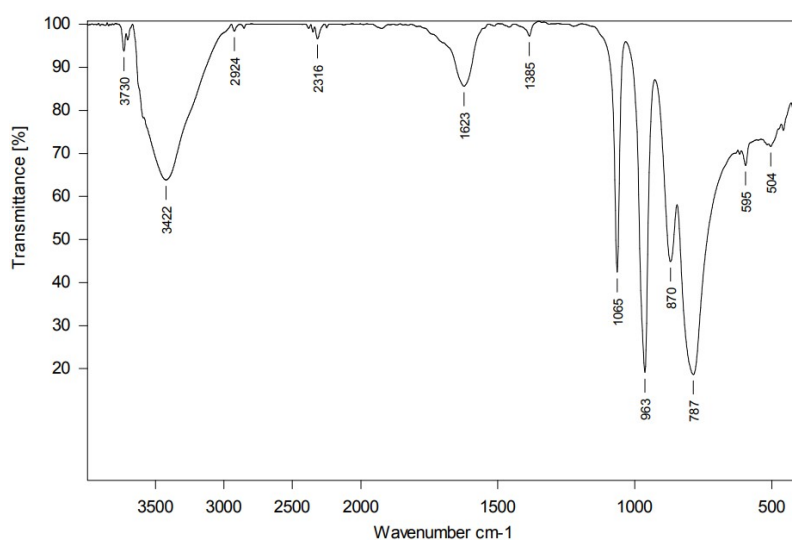

Fig. S11. The IR spectra for  $\text{H}_3\text{PMO}_{12}\text{O}_{40}$

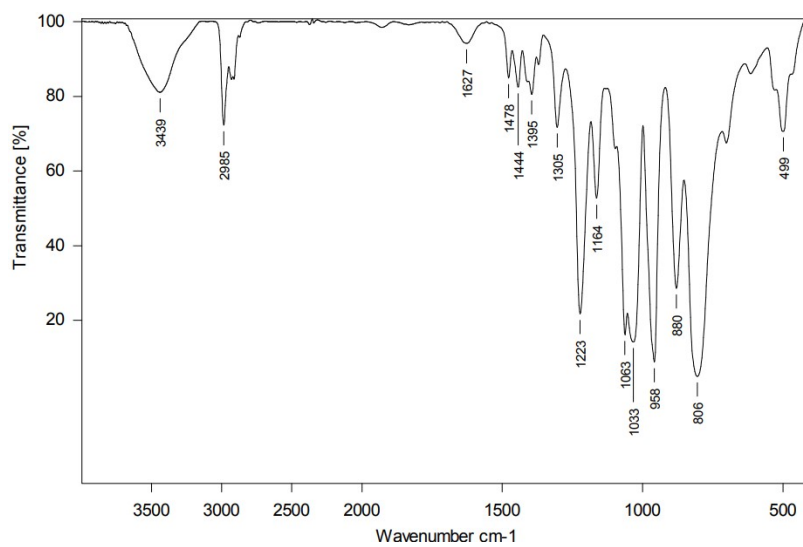

Fig. S12. The IR spectra for complex **1**

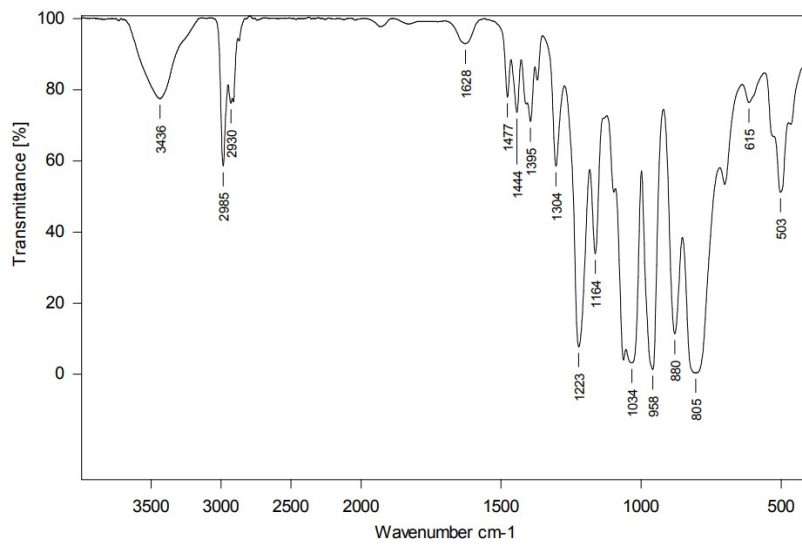

Fig. S13. The IR spectra for complex 2

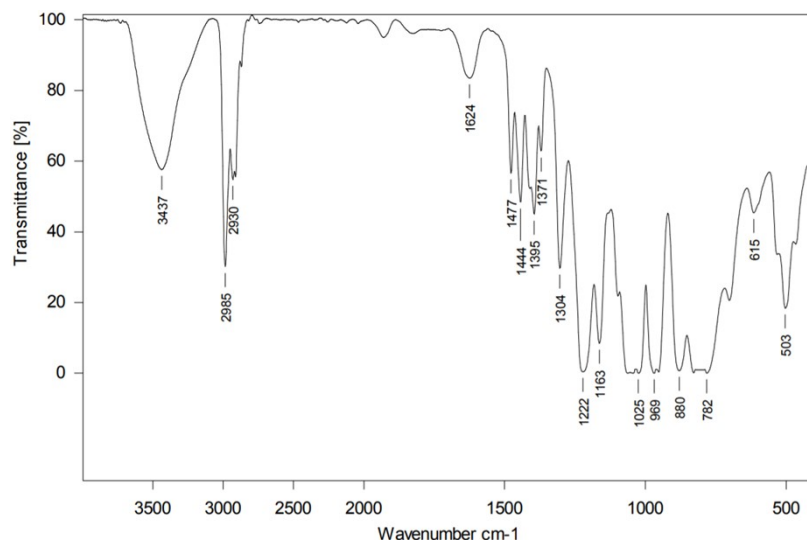

Fig. S14. The IR spectra for complex 3

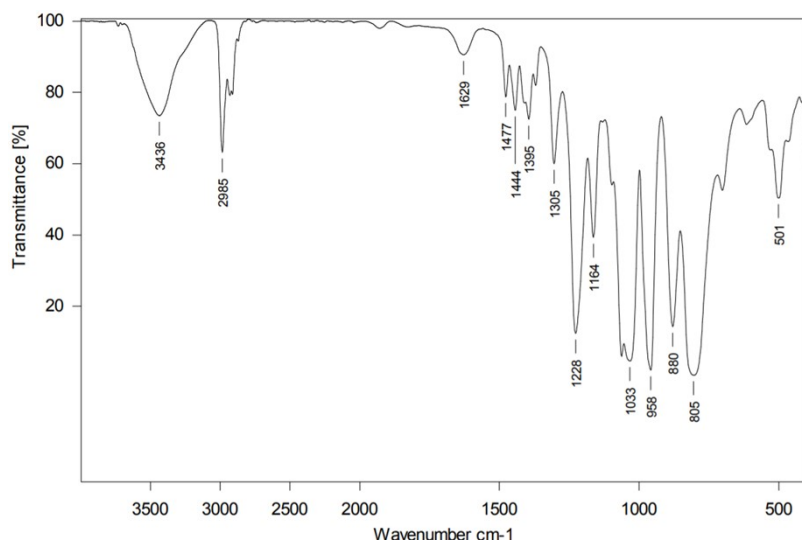

Fig. S15. The IR spectra for complex 4

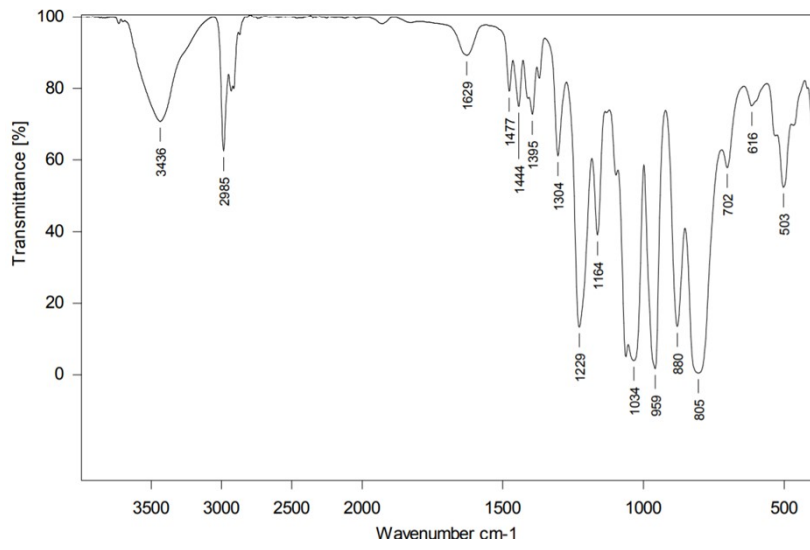

Fig. S16. The IR spectra for complex 5

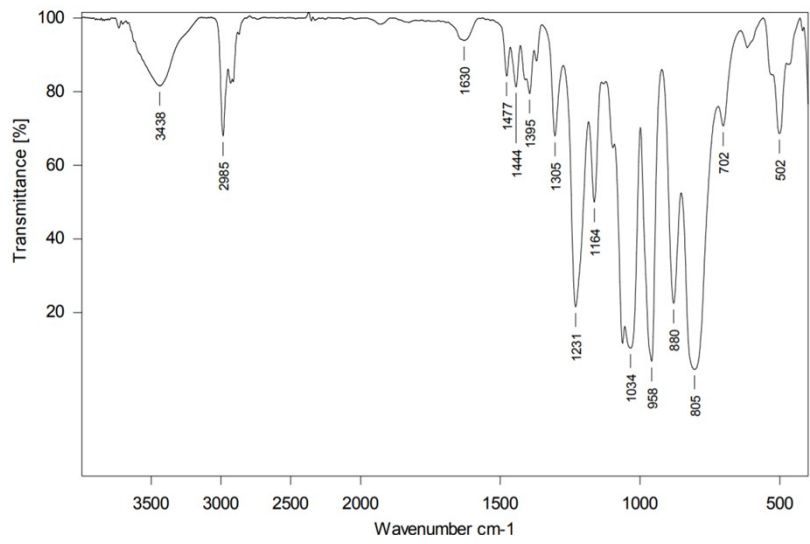

Fig. S17. The IR spectra for complex 6

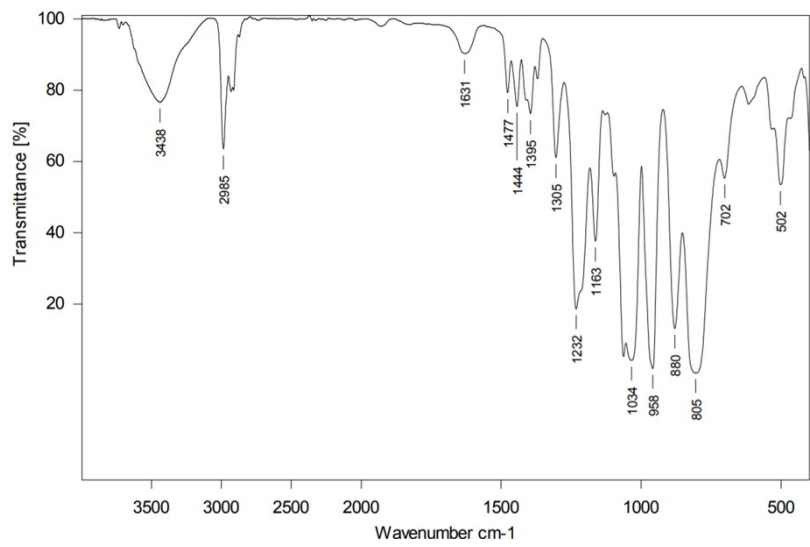

Fig. S18. The IR spectra for complex 7



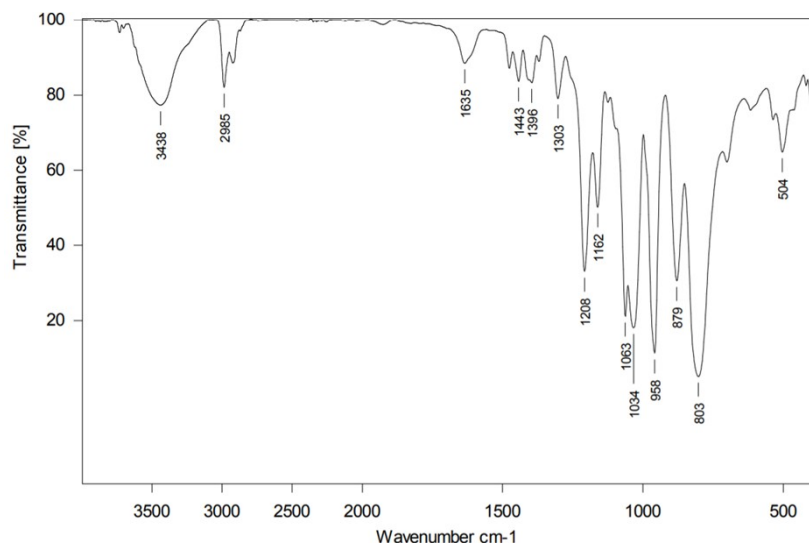

Fig. S19. The IR spectra for complex **8**

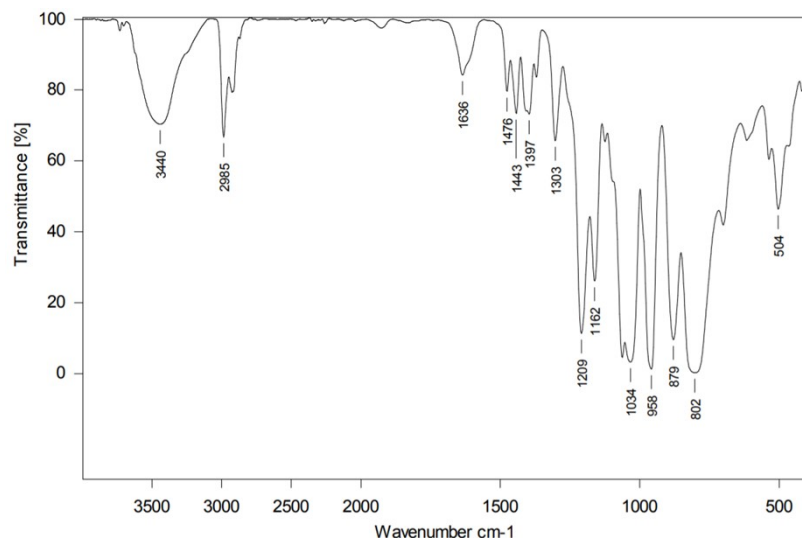

Fig. S20. The IR spectra for complex **9**

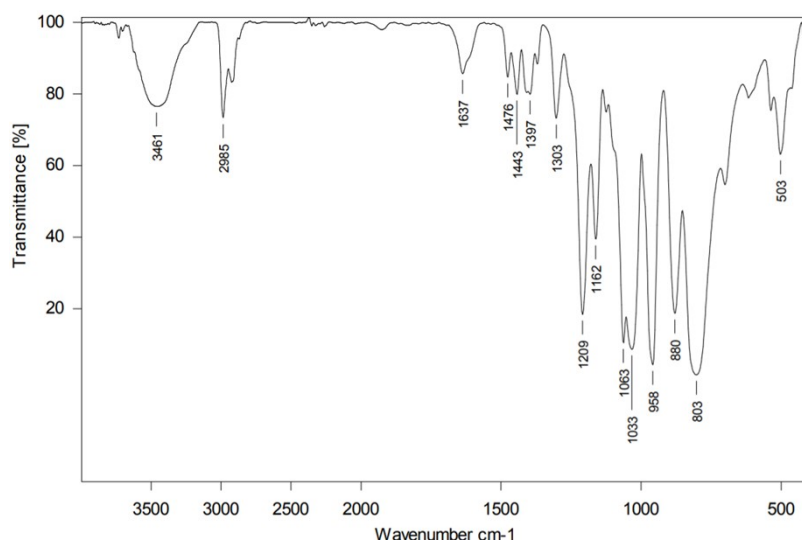

Fig. S21. The IR spectra for complex **10**

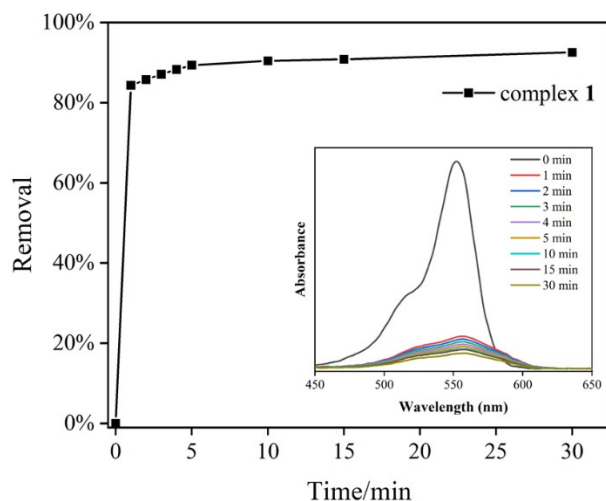

Fig. S22. Adsorption efficiency of RhB at different time intervals by complex 1. (inset: Typical absorption spectra of RhB solution at different time intervals.)

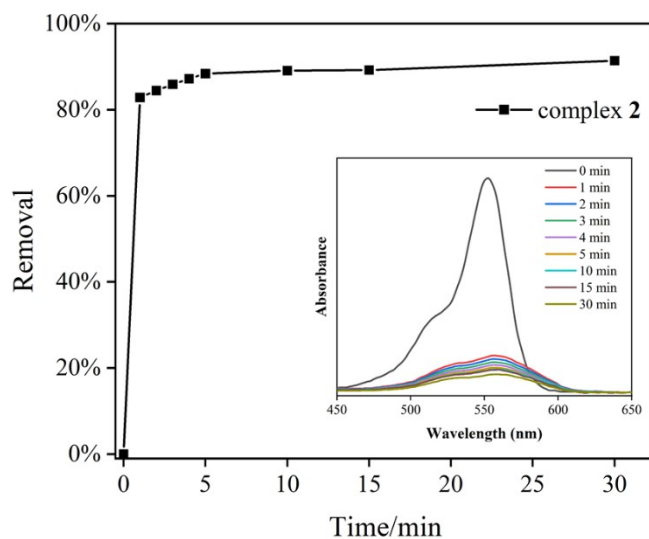

Fig. S23. Adsorption efficiency of RhB at different time intervals by complex 2. (inset: Typical absorption spectra of RhB solution at different time intervals.)

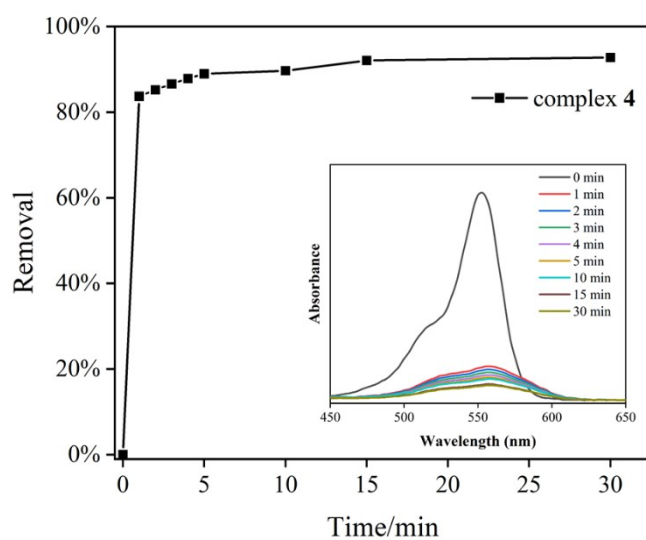

Fig. S24. Adsorption efficiency of RhB at different time intervals by complex 4. (inset: Typical absorption spectra of RhB solution at different time intervals.)

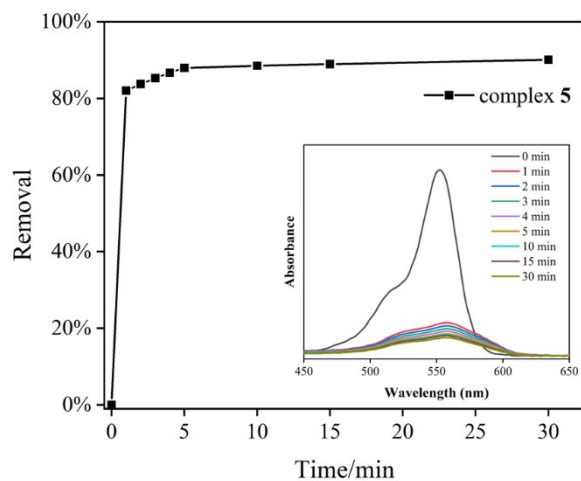

Fig. S25. Adsorption efficiency of RhB at different time intervals by complex 5. (inset: Typical absorption spectra of RhB solution at different time intervals.)

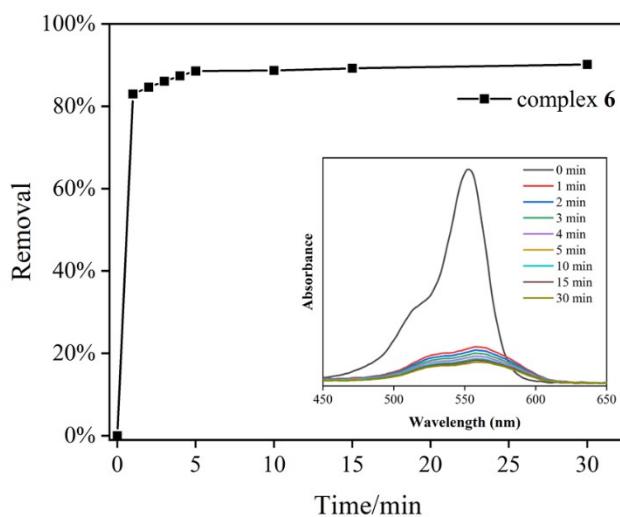

Fig. S26. Adsorption efficiency of RhB at different time intervals by complex 6. (inset: Typical absorption spectra of RhB solution at different time intervals.)

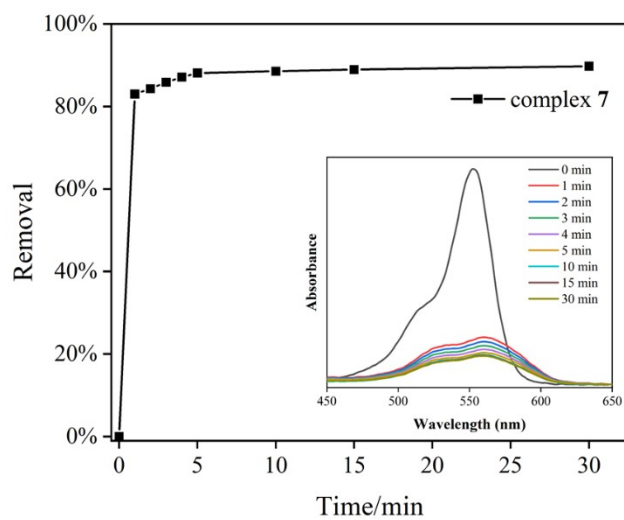

Fig. S27. Adsorption efficiency of RhB at different time intervals by complex 7. (inset: Typical absorption spectra of RhB solution at different time intervals.)

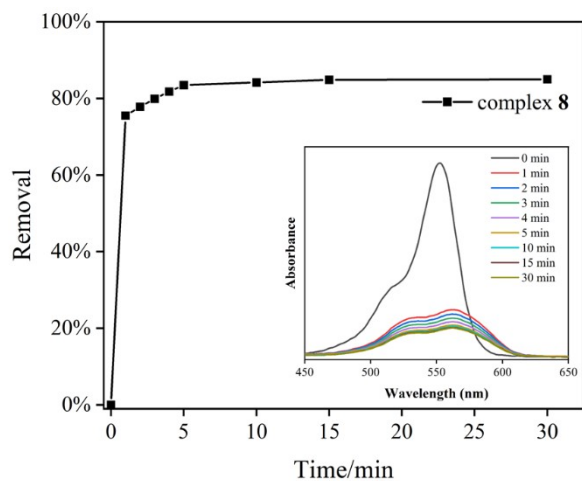

Fig. S28. Adsorption efficiency of RhB at different time intervals by complex **8**. (inset: Typical absorption spectra of RhB solution at different time intervals.)

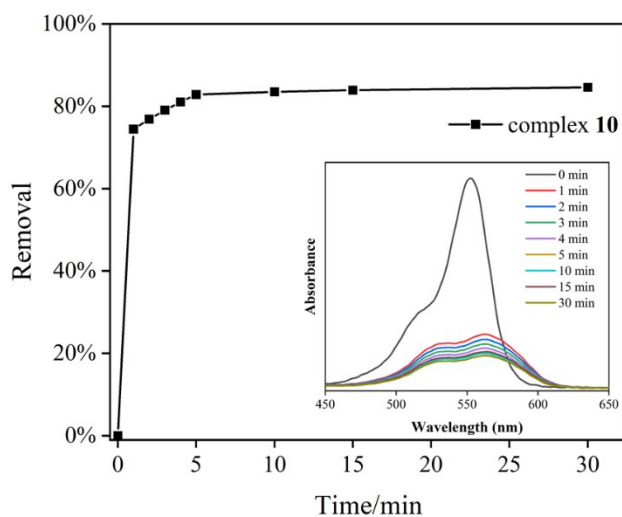

Fig. S29. Adsorption efficiency of RhB at different time intervals by complex **10**. (inset: Typical absorption spectra of RhB solution at different time intervals.)

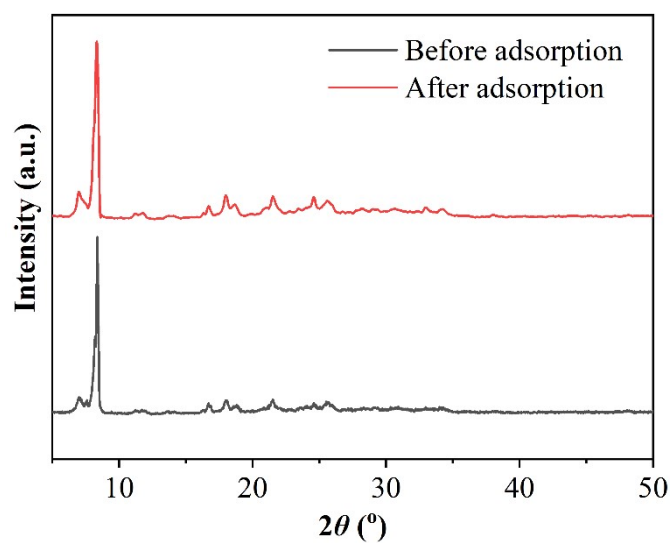

Fig. S30. PXRD of complex **3** before and after adsorption experiments.

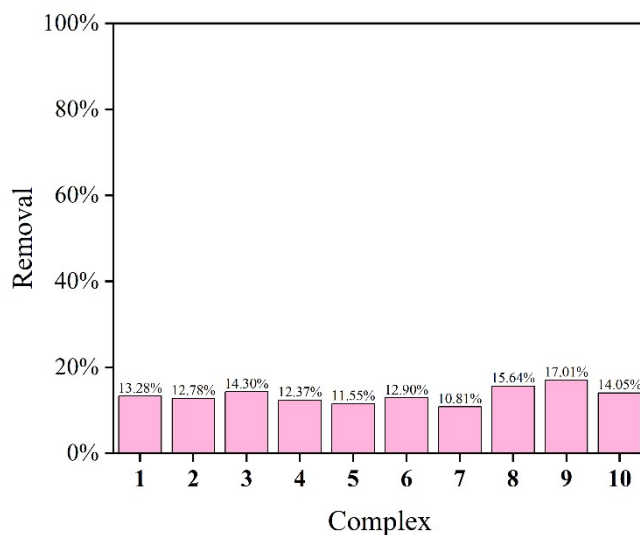

Fig. S31. Adsorption effect of MB by complexes 1-10 after stirring for 30 minutes in the dark.

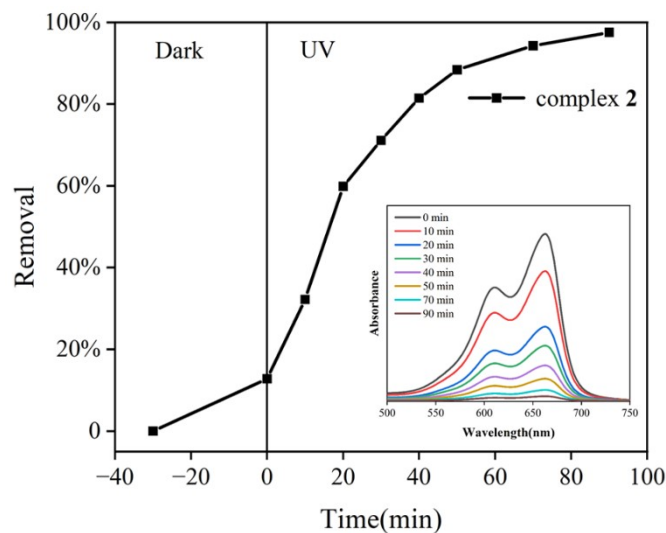

Fig. S32. Removal efficiency of MB in the photocatalytic experiment by complex 2. (inset: UV-visible absorption spectral changes observed for the MB solution under UV light irradiation)

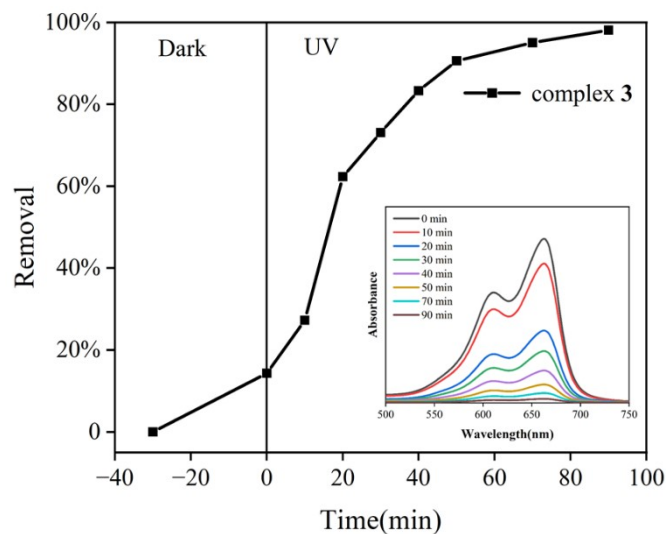

Fig. S33. Removal efficiency of MB in the photocatalytic experiment by complex 3. (inset: UV-visible absorption spectral changes observed for the MB solution under UV light irradiation)

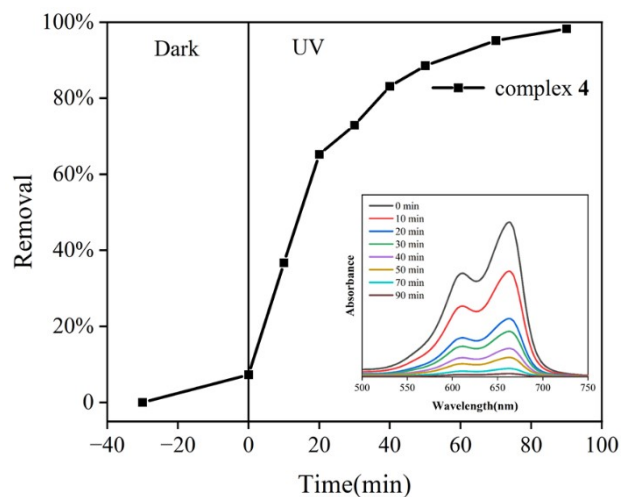

Fig. S34. Removal efficiency of MB in the photocatalytic experiment by complex 4. (inset: UV-visible absorption spectral changes observed for the MB solution under UV light irradiation)

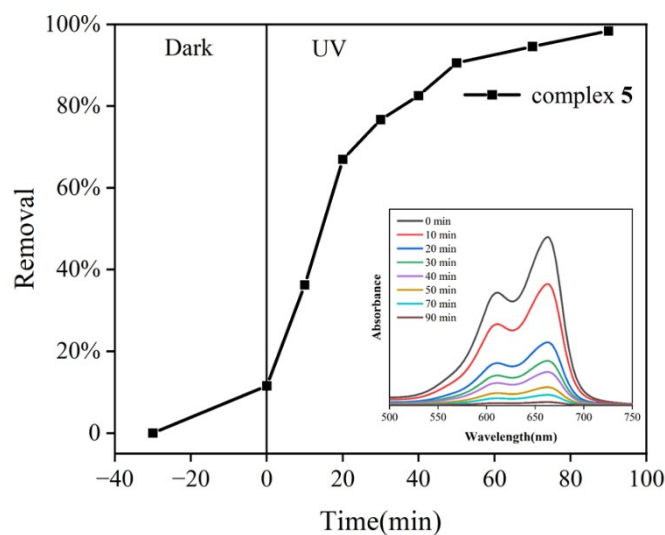

Fig. S35. Removal efficiency of MB in the photocatalytic experiment by complex 5. (inset: UV-visible absorption spectral changes observed for the MB solution under UV light irradiation)

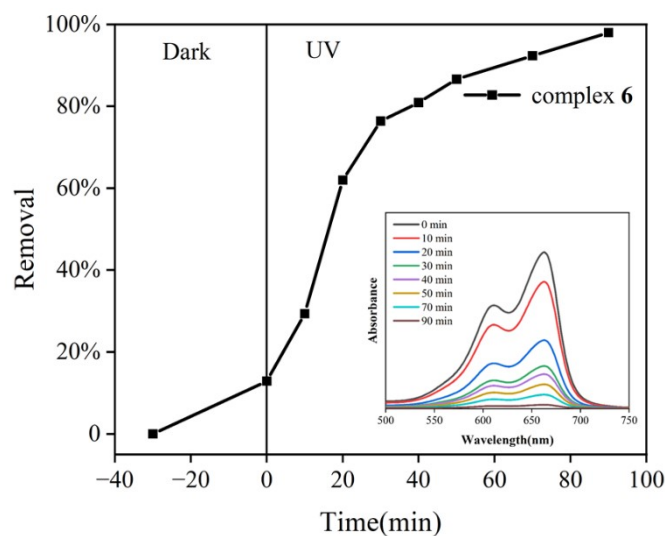

Fig. S36. Removal efficiency of MB in the photocatalytic experiment by complex 6. (inset: UV-visible absorption spectral changes observed for the MB solution under UV light irradiation)

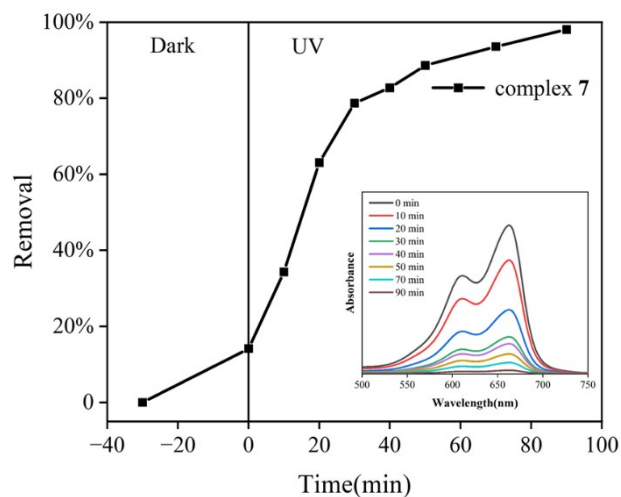

Fig. S37. Removal efficiency of MB in the photocatalytic experiment by complex **7**. (inset: UV-visible absorption spectral changes observed for the MB solution under UV light irradiation)

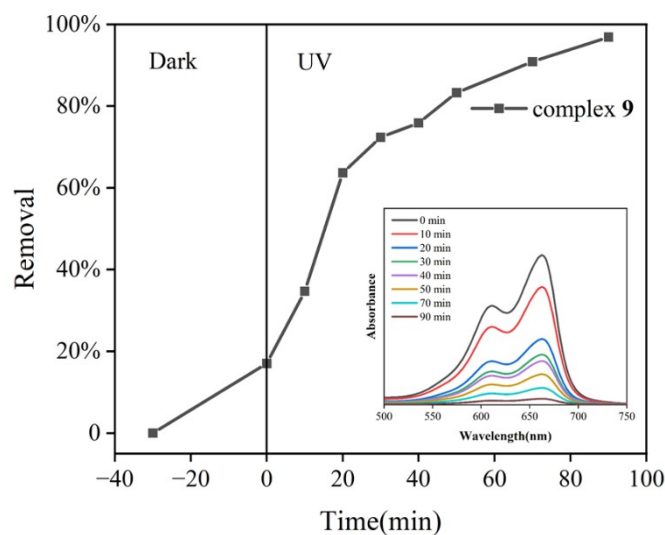

Fig. S38. Removal efficiency of MB in the photocatalytic experiment by complex **9**. (inset: UV-visible absorption spectral changes observed for the MB solution under UV light irradiation)

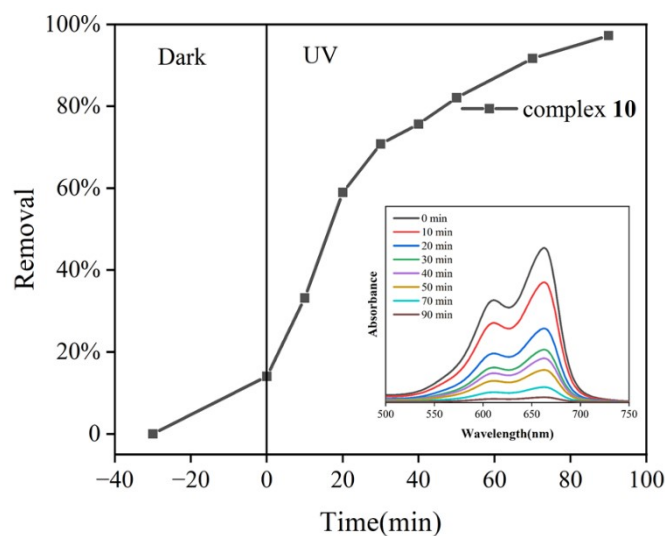

Fig. S39. Removal efficiency of MB in the photocatalytic experiment by complex **10**. (inset: UV-visible absorption spectral changes observed for the MB solution under UV light irradiation)

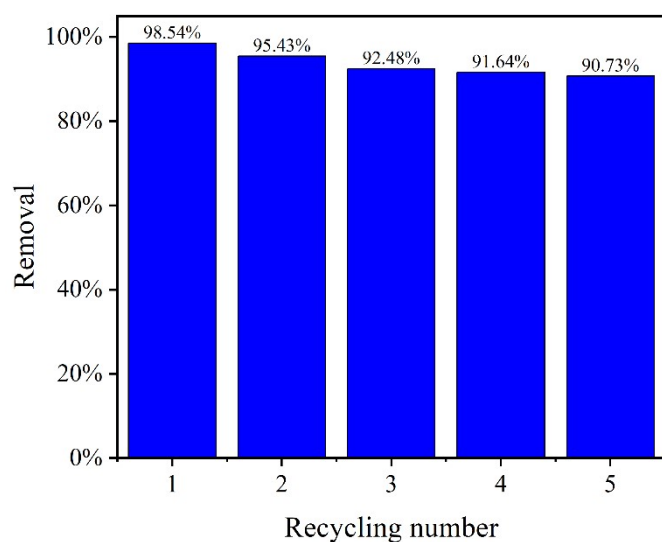

Fig. S40. The photocatalytic degradation removal rates of MB by complex **1** for 5 cycles under the same conditions

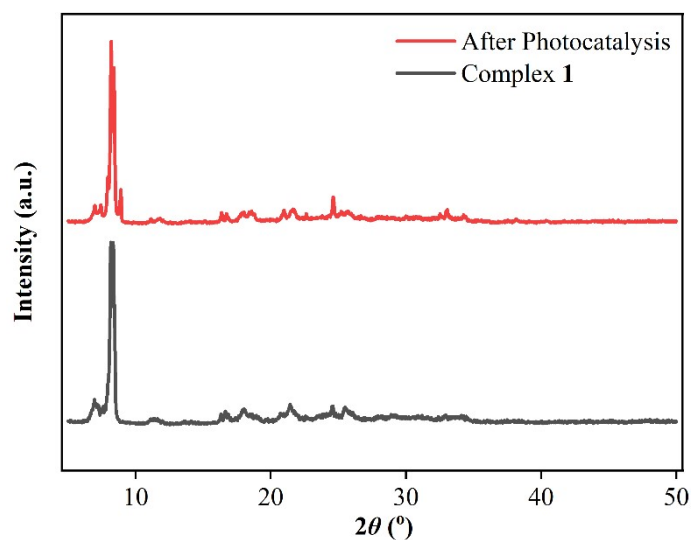

Fig. S41. PXRD of complex **1** before and after five cycles of photocatalytic experiment

Table S1. Selected bond lengths(Å) and bond angles(°) for complexes **1-10**

**1**

|                   |           |                   |           |                   |           |
|-------------------|-----------|-------------------|-----------|-------------------|-----------|
| La(1)-O(45)       | 2.460(13) | La(1)-O(46)       | 2.463(11) | La(1)-O(47)       | 2.470(10) |
| La(1)-O(48)       | 2.498(13) | La(1)-O(49)       | 2.436(11) | La(1)-O(50)       | 2.453(11) |
| La(1)-O(51)       | 2.427(12) | La(1)-O(52)       | 2.492(11) |                   |           |
| O(45)-La(1)-O(46) | 77.2(4)   | O(45)-La(1)-O(47) | 72.4(5)   | O(45)-La(1)-O(48) | 140.7(4)  |
| O(45)-La(1)-O(49) | 113.3(4)  | O(45)-La(1)-O(50) | 144.9(4)  | O(45)-La(1)-O(51) | 75.4(4)   |
| O(45)-La(1)-O(52) | 77.7(5)   | O(46)-La(1)-O(47) | 77.5(4)   | O(46)-La(1)-O(48) | 74.7(4)   |
| O(46)-La(1)-O(49) | 144.0(4)  | O(46)-La(1)-O(50) | 114.3(4)  | O(46)-La(1)-O(51) | 142.5(4)  |
| O(46)-La(1)-O(52) | 73.5(4)   | O(47)-La(1)-O(48) | 75.2(4)   | O(47)-La(1)-O(49) | 73.8(4)   |
| O(47)-La(1)-O(50) | 141.0(4)  | O(47)-La(1)-O(51) | 117.0(4)  | O(47)-La(1)-O(52) | 142.0(4)  |



|                   |          |                   |         |                   |          |
|-------------------|----------|-------------------|---------|-------------------|----------|
| O(48)-La(1)-O(49) | 77.3(4)  | O(48)-La(1)-O(50) | 73.0(4) | O(48)-La(1)-O(51) | 140.7(4) |
| O(48)-La(1)-O(52) | 118.8(4) | O(49)-La(1)-O(50) | 77.7(4) | O(49)-La(1)-O(51) | 71.7(4)  |
| O(49)-La(1)-O(52) | 141.2(4) | O(50)-La(1)-O(51) | 77.2(4) | O(50)-La(1)-O(52) | 74.7(4)  |
| O(51)-La(1)-O(52) | 76.0(4)  |                   |         |                   |          |

---

**2**


---

|                   |          |                   |          |                   |          |
|-------------------|----------|-------------------|----------|-------------------|----------|
| Ce(1)-O(45)       | 2.426(8) | Ce(1)-O(46)       | 2.443(8) | Ce(1)-O(47)       | 2.440(8) |
| Ce(1)-O(48)       | 2.471(8) | Ce(1)-O(49)       | 2.414(7) | Ce(1)-O(50)       | 2.433(8) |
| Ce(1)-O(51)       | 2.437(8) | Ce(1)-O(52)       | 2.453(8) |                   |          |
| O(45)-Ce(1)-O(46) | 77.3(3)  | O(45)-Ce(1)-O(47) | 73.1(3)  | O(45)-Ce(1)-O(48) | 141.3(3) |
| O(45)-Ce(1)-O(49) | 113.5(3) | O(45)-Ce(1)-O(50) | 143.9(3) | O(45)-Ce(1)-O(51) | 74.4(3)  |
| O(45)-Ce(1)-O(52) | 77.3(3)  | O(46)-Ce(1)-O(47) | 76.9(3)  | O(46)-Ce(1)-O(48) | 74.3(3)  |
| O(46)-Ce(1)-O(49) | 143.8(3) | O(46)-Ce(1)-O(50) | 114.6(3) | O(46)-Ce(1)-O(51) | 142.0(3) |
| O(46)-Ce(1)-O(52) | 74.0(3)  | O(47)-Ce(1)-O(48) | 75.3(3)  | O(47)-Ce(1)-O(49) | 74.0(3)  |
| O(47)-Ce(1)-O(50) | 141.3(3) | O(47)-Ce(1)-O(51) | 117.3(3) | O(47)-Ce(1)-O(52) | 142.2(3) |
| O(48)-Ce(1)-O(49) | 77.8(3)  | O(48)-Ce(1)-O(50) | 73.2(3)  | O(48)-Ce(1)-O(51) | 141.6(3) |
| O(48)-Ce(1)-O(52) | 118.3(3) | O(49)-Ce(1)-O(50) | 77.8(3)  | O(49)-Ce(1)-O(51) | 72.2(3)  |
| O(49)-Ce(1)-O(52) | 140.8(3) | O(50)-Ce(1)-O(51) | 77.4(3)  | O(50)-Ce(1)-O(52) | 74.1(3)  |
| O(51)-Ce(1)-O(52) | 75.4(3)  |                   |          |                   |          |

---

**3**


---

|                   |           |                   |           |                   |           |
|-------------------|-----------|-------------------|-----------|-------------------|-----------|
| Pr(1)-O(45)       | 2.417(14) | Pr(1)-O(46)       | 2.426(12) | Pr(1)-O(47)       | 2.392(12) |
| Pr(1)-O(48)       | 2.468(14) | Pr(1)-O(49)       | 2.399(12) | Pr(1)-O(50)       | 2.420(12) |
| Pr(1)-O(51)       | 2.411(13) | Pr(1)-O(52)       | 2.435(13) |                   |           |
| O(45)-Pr(1)-O(46) | 78.3(5)   | O(45)-Pr(1)-O(47) | 72.6(5)   | O(45)-Pr(1)-O(48) | 142.2(5)  |
| O(45)-Pr(1)-O(49) | 113.4(5)  | O(45)-Pr(1)-O(50) | 142.7(5)  | O(45)-Pr(1)-O(51) | 74.7(5)   |
| O(45)-Pr(1)-O(52) | 77.6(5)   | O(46)-Pr(1)-O(47) | 78.0(5)   | O(46)-Pr(1)-O(48) | 74.1(4)   |
| O(46)-Pr(1)-O(49) | 144.0(5)  | O(46)-Pr(1)-O(50) | 113.8(5)  | O(46)-Pr(1)-O(51) | 143.7(5)  |
| O(46)-Pr(1)-O(52) | 72.8(5)   | O(47)-Pr(1)-O(48) | 76.7(4)   | O(47)-Pr(1)-O(49) | 74.0(4)   |
| O(47)-Pr(1)-O(50) | 142.7(5)  | O(47)-Pr(1)-O(51) | 115.5(5)  | O(47)-Pr(1)-O(52) | 141.8(5)  |
| O(48)-Pr(1)-O(49) | 77.8(5)   | O(48)-Pr(1)-O(50) | 73.4(4)   | O(48)-Pr(1)-O(51) | 140.1(4)  |
| O(48)-Pr(1)-O(52) | 117.0(5)  | O(49)-Pr(1)-O(50) | 78.3(4)   | O(49)-Pr(1)-O(51) | 70.5(5)   |
| O(49)-Pr(1)-O(52) | 141.5(5)  | O(50)-Pr(1)-O(51) | 76.8(5)   | O(50)-Pr(1)-O(52) | 73.3(5)   |
| O(51)-Pr(1)-O(52) | 78.0(5)   |                   |           |                   |           |

---

**4**


---

|              |           |              |           |              |           |
|--------------|-----------|--------------|-----------|--------------|-----------|
| Sm(1)-O(23)  | 2.516(15) | Sm(1)-O(23') | 2.516(15) | Sm(1)-O(24)  | 2.452(27) |
| Sm(1)-O(24') | 2.452(27) | Sm(1)-O(25)  | 2.398(18) | Sm(1)-O(25') | 2.398(18) |

---

|                     |           |                     |           |                     |          |
|---------------------|-----------|---------------------|-----------|---------------------|----------|
| Sm(1)-O(26)         | 2.336(17) | Sm(1)-O(26')        | 2.336(17) |                     |          |
| O(23)-Sm(1)-O(23')  | 78.3(8)   | O(23)-Sm(1)-O(24)   | 72.6(8)   | O(23)-Sm(1)-O(24')  | 142.2(8) |
| O(23)-Sm(1)-O(25)   | 113.4(8)  | O(23)-Sm(1)-O(25')  | 142.7(8)  | O(23)-Sm(1)-O(26)   | 74.7(8)  |
| O(23)-Sm(1)-O(26')  | 77.6(8)   | O(23')-Sm(1)-O(24)  | 78.0(8)   | O(23')-Sm(1)-O(24') | 74.1(8)  |
| O(23')-Sm(1)-O(25)  | 144.0(8)  | O(23')-Sm(1)-O(25') | 113.8(8)  | O(23')-Sm(1)-O(26)  | 143.7(8) |
| O(23')-Sm(1)-O(26') | 72.8(8)   | O(24)-Sm(1)-O(24')  | 76.7(8)   | O(24)-Sm(1)-O(25)   | 74.0(4)  |
| O(24)-Sm(1)-O(25')  | 142.7(8)  | O(24)-Sm(1)-O(26)   | 115.5(8)  | O(24)-Sm(1)-O(26')  | 141.8(8) |
| O(24')-Sm(1)-O(25)  | 77.8(8)   | O(24')-Sm(1)-O(25') | 73.4(8)   | O(24')-Sm(1)-O(26)  | 140.1(7) |
| O(24')-Sm(1)-O(26') | 117.0(8)  | O(25)-Sm(1)-O(25')  | 78.3(8)   | O(25)-Sm(1)-O(26)   | 70.5(8)  |
| O(25)-Sm(1)-O(26')  | 141.5(8)  | O(25')-Sm(1)-O(26)  | 76.8(8)   | O(25')-Sm(1)-O(26') | 73.3(8)  |
| O(26)-Sm(1)-O(26')  | 78.0(8)   |                     |           |                     |          |

## 5

|                   |          |                   |          |                   |          |
|-------------------|----------|-------------------|----------|-------------------|----------|
| Eu(1)-O(1)        | 2.374(9) | Eu(1)-O(4)        | 2.354(8) | Eu(1)-O(7)        | 2.353(8) |
| Eu(1)-O(10)       | 2.337(8) | Eu(1)-O(13)       | 2.368(9) | Eu(1)-O(16)       | 2.345(8) |
| Eu(1)-O(19)       | 2.364(9) | Eu(1)-O(22)       | 2.388(9) |                   |          |
| O(1)-Eu(1)-O(4)   | 77.1(3)  | O(1)-Eu(1)-O(7)   | 73.6(3)  | O(1)-Eu(1)-O(10)  | 142.1(3) |
| O(1)-Eu(1)-O(13)  | 73.3(3)  | O(1)-Eu(1)-O(16)  | 77.9(4)  | O(1)-Eu(1)-O(19)  | 141.7(4) |
| O(1)-Eu(1)-O(22)  | 116.5(3) | O(4)-Eu(1)-O(7)   | 78.0(4)  | O(4)-Eu(1)-O(10)  | 72.3(3)  |
| O(4)-Eu(1)-O(13)  | 142.7(3) | O(4)-Eu(1)-O(16)  | 73.4(3)  | O(4)-Eu(1)-O(19)  | 116.4(3) |
| O(4)-Eu(1)-O(22)  | 141.6(3) | O(7)-Eu(1)-O(10)  | 78.6(3)  | O(7)-Eu(1)-O(13)  | 113.9(3) |
| O(7)-Eu(1)-O(16)  | 143.3(4) | O(7)-Eu(1)-O(19)  | 142.0(3) | O(7)-Eu(1)-O(22)  | 72.8(3)  |
| O(10)-Eu(1)-O(13) | 143.0(4) | O(10)-Eu(1)-O(16) | 113.0(4) | O(10)-Eu(1)-O(19) | 73.7(3)  |
| O(10)-Eu(1)-O(22) | 78.0(3)  | O(13)-Eu(1)-O(16) | 78.5(3)  | O(13)-Eu(1)-O(19) | 77.0(3)  |
| O(13)-Eu(1)-O(22) | 73.5(3)  | O(16)-Eu(1)-O(19) | 73.0(3)  | O(16)-Eu(1)-O(22) | 142.2(3) |
| O(19)-Eu(1)-O(22) | 76.4(3)  |                   |          |                   |          |

## 6

|                   |           |                   |           |                   |           |
|-------------------|-----------|-------------------|-----------|-------------------|-----------|
| Gd(1)-O(45)       | 2.390(12) | Gd(1)-O(46)       | 2.371(11) | Gd(1)-O(47)       | 2.403(10) |
| Gd(1)-O(48)       | 2.441(12) | Gd(1)-O(49)       | 2.362(12) | Gd(1)-O(50)       | 2.396(11) |
| Gd(1)-O(51)       | 2.394(12) | Gd(1)-O(52)       | 2.410(11) |                   |           |
| O(45)-Gd(1)-O(46) | 79.4(4)   | O(45)-Gd(1)-O(47) | 72.2(5)   | O(45)-Gd(1)-O(48) | 142.6(4)  |
| O(45)-Gd(1)-O(49) | 112.3(5)  | O(45)-Gd(1)-O(50) | 142.9(5)  | O(45)-Gd(1)-O(51) | 73.1(5)   |
| O(45)-Gd(1)-O(52) | 78.6(5)   | O(46)-Gd(1)-O(47) | 77.0(4)   | O(46)-Gd(1)-O(48) | 73.4(4)   |
| O(46)-Gd(1)-O(49) | 143.1(4)  | O(46)-Gd(1)-O(50) | 113.6(4)  | O(46)-Gd(1)-O(51) | 143.1(4)  |
| O(46)-Gd(1)-O(52) | 73.3(4)   | O(47)-Gd(1)-O(48) | 76.9(4)   | O(47)-Gd(1)-O(49) | 74.1(4)   |
| O(47)-Gd(1)-O(50) | 143.0(4)  | O(47)-Gd(1)-O(51) | 115.9(4)  | O(47)-Gd(1)-O(52) | 141.5(5)  |

|                   |          |                   |         |                   |          |
|-------------------|----------|-------------------|---------|-------------------|----------|
| O(48)-Gd(1)-O(49) | 78.0(4)  | O(48)-Gd(1)-O(50) | 73.1(4) | O(48)-Gd(1)-O(51) | 141.4(4) |
| O(48)-Gd(1)-O(52) | 116.2(5) | O(49)-Gd(1)-O(50) | 78.9(4) | O(49)-Gd(1)-O(51) | 71.8(4)  |
| O(49)-Gd(1)-O(52) | 142.0(4) | O(50)-Gd(1)-O(51) | 77.9(5) | O(50)-Gd(1)-O(52) | 73.0(4)  |
| O(51)-Gd(1)-O(52) | 77.6(4)  |                   |         |                   |          |

---

**7**


---

|                     |           |                     |           |                     |           |
|---------------------|-----------|---------------------|-----------|---------------------|-----------|
| Tb(1)-O(23)         | 2.351(17) | Tb(1)-O(23')        | 2.351(17) | Tb(1)-O(24)         | 2.308(17) |
| Tb(1)-O(24')        | 2.308(17) | Tb(1)-O(25)         | 2.309(15) | Tb(1)-O(25')        | 2.309(15) |
| Tb(1)-O(26)         | 2.254(15) | Tb(1)-O(26')        | 2.254(15) |                     |           |
| O(23)-Tb(1)-O(23')  | 141.9(8)  | O(23)-Tb(1)-O(24)   | 77.9(8)   | O(23)-Tb(1)-O(24')  | 78.4(8)   |
| O(23)-Tb(1)-O(25)   | 73.2(8)   | O(23)-Tb(1)-O(25')  | 73.8(8)   | O(23)-Tb(1)-O(26)   | 72.9(8)   |
| O(23)-Tb(1)-O(26')  | 77.3(8)   | O(23')-Tb(1)-O(24)  | 76.4(8)   | O(23')-Tb(1)-O(24') | 141.5(8)  |
| O(23')-Tb(1)-O(25)  | 115.8(8)  | O(23')-Tb(1)-O(25') | 142.3(8)  | O(23')-Tb(1)-O(26)  | 112.4(8)  |
| O(23')-Tb(1)-O(26') | 143.4(8)  | O(24)-Tb(1)-O(24')  | 73.4(8)   | O(24)-Tb(1)-O(25)   | 79.0(8)   |
| O(24)-Tb(1)-O(25')  | 78.5(8)   | O(24)-Tb(1)-O(26)   | 71.4(8)   | O(24)-Tb(1)-O(26')  | 141.4(8)  |
| O(24')-Tb(1)-O(25)  | 143.6(5)  | O(24')-Tb(1)-O(25') | 114.3(8)  | O(24')-Tb(1)-O(26)  | 72.9(8)   |
| O(24')-Tb(1)-O(26') | 78.0(8)   | O(25)-Tb(1)-O(25')  | 73.9(8)   | O(25)-Tb(1)-O(26)   | 73.5(8)   |
| O(25)-Tb(1)-O(26')  | 142.9(8)  | O(25')-Tb(1)-O(26)  | 141.8(8)  | O(25')-Tb(1)-O(26') | 76.9(8)   |
| O(26)-Tb(1)-O(26')  | 116.7(8)  |                     |           |                     |           |

---

**8**


---

|                   |           |                   |           |                   |           |
|-------------------|-----------|-------------------|-----------|-------------------|-----------|
| Tm(1)-O(45)       | 2.239(10) | Tm(1)-O(48)       | 2.238(10) | Tm(1)-O(51)       | 2.237(11) |
| Tm(1)-O(54)       | 2.238(10) | Tm(1)-O(57)       | 2.230(11) | Tm(1)-O(60)       | 2.216(11) |
| Tm(1)-O(63)       | 2.361(11) |                   |           |                   |           |
| O(45)-Tm(1)-O(48) | 76.4(4)   | O(45)-Tm(1)-O(51) | 81.1(4)   | O(45)-Tm(1)-O(54) | 126.54(4) |
| O(45)-Tm(1)-O(57) | 146.4(4)  | O(45)-Tm(1)-O(60) | 101.5(5)  | O(45)-Tm(1)-O(63) | 71.0(4)   |
| O(48)-Tm(1)-O(51) | 124.9(4)  | O(48)-Tm(1)-O(54) | 76.9(4)   | O(48)-Tm(1)-O(57) | 134.6(4)  |
| O(48)-Tm(1)-O(60) | 76.9(4)   | O(48)-Tm(1)-O(63) | 134.8(4)  | O(51)-Tm(1)-O(54) | 77.5(4)   |
| O(51)-Tm(1)-O(57) | 86.9(4)   | O(51)-Tm(1)-O(60) | 157.5(4)  | O(51)-Tm(1)-O(63) | 80.2(4)   |
| O(54)-Tm(1)-O(57) | 80.5(4)   | O(54)-Tm(1)-O(60) | 116.3(5)  | O(54)-Tm(1)-O(63) | 148.3(4)  |
| O(57)-Tm(1)-O(60) | 78.7(4)   | O(57)-Tm(1)-O(63) | 76.0(4)   | O(60)-Tm(1)-O(63) | 79.7(5)   |

---

**9**


---

|                   |           |                   |           |                   |           |
|-------------------|-----------|-------------------|-----------|-------------------|-----------|
| Yb(1)-O(45)       | 2.219(10) | Yb(1)-O(48)       | 2.208(11) | Yb(1)-O(51)       | 2.208(11) |
| Yb(1)-O(54)       | 2.216(10) | Yb(1)-O(57)       | 2.224(12) | Yb(1)-O(60)       | 2.198(11) |
| Yb(1)-O(63)       | 2.349(12) |                   |           |                   |           |
| O(45)-Yb(1)-O(48) | 75.9(4)   | O(45)-Yb(1)-O(51) | 80.8(4)   | O(45)-Yb(1)-O(54) | 126.4(4)  |
| O(45)-Yb(1)-O(57) | 146.4(4)  | O(45)-Yb(1)-O(60) | 102.1(5)  | O(45)-Yb(1)-O(63) | 71.1(4)   |

---

|                   |           |                   |           |                   |           |
|-------------------|-----------|-------------------|-----------|-------------------|-----------|
| O(48)-Yb(1)-O(51) | 124.4(4)  | O(48)-Yb(1)-O(54) | 77.0(4)   | O(48)-Yb(1)-O(57) | 135.2(4)  |
| O(48)-Yb(1)-O(60) | 77.3(4)   | O(48)-Yb(1)-O(63) | 134.2(4)  | O(51)-Yb(1)-O(54) | 77.7(4)   |
| O(51)-Yb(1)-O(57) | 87.0(4)   | O(51)-Yb(1)-O(60) | 157.7(4)  | O(51)-Yb(1)-O(63) | 80.6(4)   |
| O(54)-Yb(1)-O(57) | 80.5(4)   | O(54)-Yb(1)-O(60) | 115.8(5)  | O(54)-Yb(1)-O(63) | 148.7(4)  |
| O(57)-Yb(1)-O(60) | 78.4(5)   | O(57)-Yb(1)-O(63) | 76.1(4)   | O(60)-Yb(1)-O(63) | 79.5(5)   |
| <b>10</b>         |           |                   |           |                   |           |
| Y(1)-O(1)         | 2.219(10) | Y(1)-O(4)         | 2.208(11) | Y(1)-O(7)         | 2.208(11) |
| Y(1)-O(10)        | 2.216(10) | Y(1)-O(13)        | 2.224(12) | Y(1)-O(16)        | 2.198(11) |
| Y(1)-O(19)        | 2.349(12) |                   |           |                   |           |
| O(1)-Y(1)-O(4)    | 75.8(4)   | O(1)-Y(1)-O(7)    | 125.0(4)  | O(1)-Y(1)-O(10)   | 76.8(4)   |
| O(1)-Y(1)-O(13)   | 135.0(4)  | O(1)-Y(1)-O(16)   | 77.5(4)   | O(1)-Y(1)-O(19)   | 134.6(4)  |
| O(4)-Y(1)-O(7)    | 80.9(4)   | O(4)-Y(1)-O(10)   | 125.5(4)  | O(4)-Y(1)-O(13)   | 146.9(4)  |
| O(4)-Y(1)-O(16)   | 102.5(4)  | O(4)-Y(1)-O(19)   | 71.0(4)   | O(7)-Y(1)-O(10)   | 77.8(4)   |
| O(7)-Y(1)-O(13)   | 86.5(4)   | O(7)-Y(1)-O(16)   | 156.9(4)  | O(7)-Y(1)-O(19)   | 79.2(4)   |
| O(10)-Y(1)-O(13)  | 80.7(4)   | O(10)-Y(1)-O(16)  | 116.2(4)  | O(10)-Y(1)-O(19)  | 148.5(4)  |
| O(13)-Y(1)-O(16)  | 78.3(4)   | O(13)-Y(1)-O(19)  | 76.6(4)   | O(16)-Y(1)-O(19)  | 80.3(4)   |

Table S2. Weak interactions in the stacking structure of complex 1

| Intermolecular hydrogen bonds in the stacking structure of complex 1 |         |         |         |
|----------------------------------------------------------------------|---------|---------|---------|
| Donor-H...Acceptor                                                   | D-H (Å) | H-A (Å) | D-A (Å) |
| C(2)-H(2A)...O(15)                                                   | 0.97    | 2.43    | 3.30(2) |
| C(3)-H(3B)...O(14)                                                   | 0.97    | 2.57    | 3.38(3) |
| C(11)-H(11A)...O(13)                                                 | 0.97    | 2.39    | 3.21(2) |
| C(17)-H(17A)...O(5)                                                  | 0.97    | 2.48    | 3.41(3) |
| C(18)-H(18B)...O(21)                                                 | 0.96    | 2.35    | 3.27(2) |
| C(22)-H(22A)...O(37)                                                 | 0.97    | 2.54    | 3.43(3) |
| C(23)-H(23B)...O(30)                                                 | 0.97    | 2.46    | 3.31(3) |
| C(23)-H(23B)...O(44)                                                 | 0.97    | 2.56    | 3.32(3) |
| C(31)-H(31A)...O(39)                                                 | 0.97    | 2.58    | 3.47(3) |
| C(32)-H(32A)...O(44)                                                 | 0.97    | 2.27    | 3.23(3) |
| C(35)-H(35A)...O(29)                                                 | 0.97    | 2.57    | 3.26(3) |
| C(36)-H(36B)...O(34)                                                 | 0.96    | 2.58    | 3.45(3) |
| C(42)-H(42A)...O(22)                                                 | 0.96    | 2.57    | 3.49(3) |

Intramolecular hydrogen bonding in the stacking structure of complex 1

| Donor-H...Acceptor   | D-H (Å) | H-A (Å) | D-A (Å) |
|----------------------|---------|---------|---------|
| C(3)-H(3A)...O(54)   | 0.97    | 2.49    | 2.90(3) |
| C(13)-H(13A)...O(58) | 0.97    | 2.58    | 3.00(2) |
| C(15)-H(15B)...O(47) | 0.97    | 2.44    | 2.78(3) |
| C(25)-H(25A)...O(49) | 0.97    | 2.36    | 2.88(3) |
| C(33)-H(33A)...O(66) | 0.97    | 2.54    | 2.97(3) |
| C(37)-H(37A)...O(52) | 0.96    | 2.39    | 2.84(3) |

Table S3. Weak interactions in the stacking structure of complex **2**

| Intermolecular hydrogen bonds in the stacking structure of complex <b>2</b> |         |         |         |
|-----------------------------------------------------------------------------|---------|---------|---------|
| Donor-H...Acceptor                                                          | D-H (Å) | H-A (Å) | D-A (Å) |
| C(2)-H(2A)...O(15)                                                          | 0.97    | 2.44    | 3.30(2) |
| C(3)-H(3B)...O(14)                                                          | 0.97    | 2.47    | 3.30(3) |
| C(11)-H(11A)...O(13)                                                        | 0.97    | 2.40    | 3.23(2) |
| C(17)-H(17A)...O(5)                                                         | 0.97    | 2.43    | 3.35(3) |
| C(22)-H(22A)...O(37)                                                        | 0.97    | 2.49    | 3.39(2) |
| C(23)-H(23B)...O(30)                                                        | 0.97    | 2.53    | 3.37(3) |
| C(23)-H(23B)...O(44)                                                        | 0.97    | 2.48    | 3.26(3) |
| C(29)-H(29B)...O(33)                                                        | 0.97    | 2.60    | 3.54(3) |
| C(32)-H(32A)...O(44)                                                        | 0.97    | 2.50    | 3.25(3) |
| C(36)-H(36B)...O(34)                                                        | 0.96    | 2.56    | 3.41(3) |
| C(42)-H(42A)...O(22)                                                        | 0.96    | 2.58    | 3.41(3) |

  

| Intramolecular hydrogen bonding in the stacking structure of complex <b>2</b> |         |         |         |
|-------------------------------------------------------------------------------|---------|---------|---------|
| Donor-H...Acceptor                                                            | D-H (Å) | H-A (Å) | D-A (Å) |
| C(2)-H(2B)...O(54)                                                            | 0.97    | 2.59    | 3.10(3) |
| C(13)-H(13A)...O(58)                                                          | 0.97    | 2.52    | 2.92(2) |
| C(15)-H(15B)...O(47)                                                          | 0.97    | 2.48    | 2.82(3) |
| C(17)-H(17B)...O(48)                                                          | 0.97    | 2.58    | 2.96(2) |
| C(25)-H(25A)...O(49)                                                          | 0.97    | 2.41    | 2.89(3) |
| C(33)-H(33A)...O(66)                                                          | 0.97    | 2.50    | 2.94(3) |

Table S4. Weak interactions in the stacking structure of complex **3**

| Intermolecular hydrogen bonds in the stacking structure of complex <b>3</b> |         |         |         |
|-----------------------------------------------------------------------------|---------|---------|---------|
| Donor-H...Acceptor                                                          | D-H (Å) | H-A (Å) | D-A (Å) |

|                      |      |      |         |
|----------------------|------|------|---------|
| C(2)-H(2A)···O(15)   | 0.97 | 2.48 | 3.29(3) |
| C(3)-H(3B)···O(14)   | 0.98 | 2.52 | 3.32(3) |
| C(11)-H(11A)···O(13) | 0.97 | 2.43 | 3.25(3) |
| C(17)-H(17A)···O(5)  | 0.97 | 2.43 | 3.35(3) |
| C(18)-H(18A)···O(22) | 0.96 | 2.54 | 3.49(3) |
| C(18)-H(18B)···O(21) | 0.96 | 2.35 | 3.28(3) |
| C(22)-H(22A)···O(37) | 0.97 | 2.47 | 3.37(3) |
| C(23)-H(23B)···O(30) | 0.97 | 2.48 | 3.30(3) |
| C(23)-H(23B)···O(44) | 0.97 | 2.53 | 3.28(3) |
| C(29)-H(29B)···O(33) | 0.97 | 2.55 | 3.51(3) |
| C(31)-H(31A)···O(39) | 0.97 | 2.54 | 3.44(3) |
| C(32)-H(32A)···O(44) | 0.97 | 2.24 | 3.20(3) |
| C(35)-H(35A)···O(29) | 0.97 | 2.58 | 3.28(3) |
| C(36)-H(36B)···O(34) | 0.97 | 2.56 | 3.40(3) |
| C(36)-H(36B)···O(36) | 0.97 | 2.55 | 3.34(3) |

Intramolecular hydrogen bonding in the stacking structure of complex **3**

| Donor-H···Acceptor   | D-H (Å) | H-A (Å) | D-A (Å) |
|----------------------|---------|---------|---------|
| C(1)-H(1B)···O(68)   | 0.97    | 2.57    | 3.45(3) |
| C(2)-H(2B)···O(54)   | 0.97    | 2.54    | 3.11(3) |
| C(13)-H(13A)···O(58) | 0.97    | 2.53    | 2.96(3) |
| C(15)-H(15B)···O(47) | 0.97    | 2.54    | 2.88(3) |
| C(25)-H(25A)···O(49) | 0.97    | 2.38    | 2.87(3) |
| C(33)-H(33A)···O(66) | 0.97    | 2.50    | 2.91(3) |
| C(37)-H(37A)···O(52) | 0.97    | 2.44    | 2.89(3) |

Table S5. Weak interactions in the stacking structure of complex **4**

Intermolecular hydrogen bonds in the stacking structure of complex **4**

| Donor-H···Acceptor   | D-H (Å) | H-A (Å) | D-A (Å) |
|----------------------|---------|---------|---------|
| C(4)-H(4A)···O(6)    | 0.96    | 2.44    | 3.01(7) |
| C(7)-H(7A)···O(19)   | 0.97    | 2.55    | 3.27(5) |
| C(20)-H(20C)···O(18) | 0.96    | 2.57    | 3.42(9) |

Intramolecular hydrogen bonding in the stacking structure of complex **4**

| Donor-H···Acceptor | D-H (Å) | H-A (Å) | D-A (Å) |
|--------------------|---------|---------|---------|
| C(5)-H(5A)···O(33) | 0.97    | 2.32    | 3.20(6) |

|                    |      |      |         |
|--------------------|------|------|---------|
| C(5)-H(5B)···O(27) | 0.97 | 2.34 | 2.75(6) |
|--------------------|------|------|---------|

Table S6. Weak interactions in the stacking structure of complex 5

| Intermolecular hydrogen bonds in the stacking structure of complex 5   |         |         |         |
|------------------------------------------------------------------------|---------|---------|---------|
| Donor-H···Acceptor                                                     | D-H (Å) | H-A (Å) | D-A (Å) |
| C(3)-H(3A)···O(43)                                                     | 0.97    | 2.53    | 3.47(2) |
| C(10)-H(10C)···O(34)                                                   | 0.97    | 2.48    | 3.31(3) |
| C(15)-H(15A)···O(33)                                                   | 0.97    | 2.57    | 3.52(2) |
| C(17)-H(17A)···O(40)                                                   | 0.97    | 2.46    | 3.30(2) |
| C(17)-H(17A)···O(43)                                                   | 0.97    | 2.59    | 3.30(3) |
| C(21)-H(21B)···O(51)                                                   | 0.97    | 2.47    | 3.30(2) |
| C(27)-H(27A)···O(68)                                                   | 0.97    | 2.51    | 3.37(3) |
| C(31)-H(31B)···O(66)                                                   | 0.97    | 2.39    | 3.22(2) |
| C(34)-H(34B)···O(59)                                                   | 0.96    | 2.60    | 3.33(2) |
| C(37)-H(37B)···O(60)                                                   | 0.97    | 2.49    | 3.38(2) |
| C(38)-H(38A)···O(67)                                                   | 0.96    | 2.56    | 3.52(3) |
| C(38)-H(38C)···O(53)                                                   | 0.96    | 2.39    | 3.29(2) |
| C(40)-H(40C)···O(37)                                                   | 0.96    | 2.50    | 3.37(2) |
| Intramolecular hydrogen bonding in the stacking structure of complex 5 |         |         |         |
| Donor-H···Acceptor                                                     | D-H (Å) | H-A (Å) | D-A (Å) |
| C(5)-H(5B)···O(1)                                                      | 0.97    | 2.52    | 2.99(4) |
| C(7)-H(7B)···O(6)                                                      | 0.97    | 2.54    | 2.99(3) |
| C(19)-H(19B)···O(10)                                                   | 0.97    | 2.49    | 2.96(3) |
| C(33)-H(33B)···O(21)                                                   | 0.97    | 2.57    | 2.97(2) |

Table S7. Weak interactions in the stacking structure of complex 6

| Intermolecular hydrogen bonds in the stacking structure of complex 6 |         |         |         |
|----------------------------------------------------------------------|---------|---------|---------|
| Donor-H···Acceptor                                                   | D-H (Å) | H-A (Å) | D-A (Å) |
| C(2)-H(2A)···O(15)                                                   | 0.97    | 2.59    | 3.40(2) |
| C(3)-H(3B)···O(14)                                                   | 0.97    | 2.59    | 3.44(3) |
| C(11)-H(11A)···O(13)                                                 | 0.97    | 2.40    | 3.24(2) |
| C(17)-H(17A)···O(5)                                                  | 0.97    | 2.53    | 3.42(3) |
| C(18)-H(18B)···O(21)                                                 | 0.96    | 2.43    | 3.35(3) |
| C(22)-H(22A)···O(37)                                                 | 0.97    | 2.55    | 3.44(3) |

|                                                                               |         |         |         |
|-------------------------------------------------------------------------------|---------|---------|---------|
| C(23)-H(23B)···O(30)                                                          | 0.96    | 2.53    | 3.28(3) |
| C(31)-H(31A)···O(39)                                                          | 0.97    | 2.58    | 3.49(3) |
| C(32)-H(32A)···O(44)                                                          | 0.97    | 2.27    | 3.23(3) |
| C(36)-H(36B)···O(34)                                                          | 0.96    | 2.26    | 2.76(3) |
| C(42)-H(42A)···O(22)                                                          | 0.96    | 2.56    | 3.47(3) |
| Intramolecular hydrogen bonding in the stacking structure of complex <b>6</b> |         |         |         |
| Donor-H···Acceptor                                                            | D-H (Å) | H-A (Å) | D-A (Å) |
| C(3)-H(3A)···O(54)                                                            | 0.97    | 2.54    | 3.00(3) |
| C(19)-H(19B)···O(59)                                                          | 0.97    | 2.55    | 2.88(3) |
| C(25)-H(25A)···O(49)                                                          | 0.97    | 2.52    | 3.01(3) |
| C(37)-H(37A)···O(52)                                                          | 0.97    | 2.26    | 2.76(3) |

Table S8. Weak interactions in the stacking structure of complex **7**

|                                                                               |         |         |          |
|-------------------------------------------------------------------------------|---------|---------|----------|
| Intermolecular hydrogen bonds in the stacking structure of complex <b>7</b>   |         |         |          |
| Donor-H···Acceptor                                                            | D-H (Å) | H-A (Å) | D-A (Å)  |
| C(2)-H(2A)···O(5)                                                             | 0.97    | 2.58    | 3.38(4)  |
| C(4)-H(4A)···O(6)                                                             | 0.96    | 2.21    | 2.87(7)  |
| C(7)-H(7A)···O(19)                                                            | 0.97    | 2.46    | 3.28(5)  |
| C(9)-H(9A)···O(13)                                                            | 0.97    | 2.20    | 2.99(6)  |
| C(9)-H(9B)···O(11)                                                            | 0.97    | 2.19    | 2.90(6)  |
| C(20)-H(20B)···O(18)                                                          | 0.95    | 2.13    | 2.79(10) |
| Intramolecular hydrogen bonding in the stacking structure of complex <b>7</b> |         |         |          |
| Donor-H···Acceptor                                                            | D-H (Å) | H-A (Å) | D-A (Å)  |
| C(1)-H(1B)···O(30)                                                            | 0.97    | 2.60    | 3.13(5)  |
| C(5)-H(5A)···O(33)                                                            | 0.96    | 2.53    | 3.34(6)  |
| C(5)-H(5B)···O(27)                                                            | 0.97    | 2.42    | 2.81(6)  |
| C(14)-H(14B)···O(32)                                                          | 0.96    | 2.56    | 3.25(6)  |

Table S9. Weak interactions in the stacking structure of complex **8**

|                                                                             |         |         |         |
|-----------------------------------------------------------------------------|---------|---------|---------|
| Intermolecular hydrogen bonds in the stacking structure of complex <b>8</b> |         |         |         |
| Donor-H···Acceptor                                                          | D-H (Å) | H-A (Å) | D-A (Å) |
| O(63)-H(63C)···N(1)                                                         | 0.83    | 2.00    | 2.81(2) |
| O(63)-H(63D)···O(19)                                                        | 0.85    | 2.08    | 2.91(2) |



|                      |      |      |         |
|----------------------|------|------|---------|
| C(1)-H(1A)···O(38)   | 0.97 | 2.53 | 3.31(2) |
| C(1)-H(1B)···O(14)   | 0.97 | 2.46 | 3.39(2) |
| C(2)-H(2B)···O(35)   | 0.97 | 2.53 | 3.37(2) |
| C(12)-H(12B)···O(31) | 0.97 | 2.58 | 3.48(2) |
| C(14)-H(14B)···O(10) | 0.96 | 2.51 | 3.46(3) |
| C(19)-H(19B)···O(31) | 0.97 | 2.51 | 3.21(2) |
| C(20)-H(20A)···O(32) | 0.96 | 2.59 | 3.42(3) |
| C(25)-H(25A)···O(34) | 0.97 | 2.50 | 3.46(3) |
| C(26)-H(26B)···O(38) | 0.97 | 2.44 | 3.44(3) |
| C(26)-H(26C)···O(16) | 0.96 | 2.56 | 3.26(3) |
| C(29)-H(29B)···O(16) | 0.97 | 2.45 | 3.41(3) |
| C(32)-H(32A)···O(12) | 0.96 | 2.49 | 3.43(2) |

Intramolecular hydrogen bonding in the stacking structure of complex **8**

| Donor-H···Acceptor   | D-H (Å) | H-A (Å) | D-A (Å) |
|----------------------|---------|---------|---------|
| C(7)-H(7B)···O(56)   | 0.97    | 2.52    | 3.23(2) |
| C(17)-H(17A)···O(58) | 0.97    | 2.53    | 3.45(3) |
| C(23)-H(23A)···O(59) | 0.97    | 2.51    | 2.85(3) |
| C(25)-H(25B)···O(57) | 0.97    | 2.55    | 2.95(2) |

Table S10. Weak interactions in the stacking structure of complex **9**

Intermolecular hydrogen bonds in the stacking structure of complex **9**

| Donor-H···Acceptor   | D-H (Å) | H-A (Å) | D-A (Å) |
|----------------------|---------|---------|---------|
| O(63)-H(63C)···N(1)  | 0.83    | 2.00    | 2.81(3) |
| O(63)-H(63D)···O(19) | 0.86    | 2.06    | 2.89(2) |
| C(1)-H(1A)···O(38)   | 0.97    | 2.52    | 3.31(2) |
| C(1)-H(1B)···O(14)   | 0.97    | 2.42    | 3.35(2) |
| C(2)-H(2B)···O(35)   | 0.97    | 2.54    | 3.37(2) |
| C(12)-H(12B)···O(31) | 0.97    | 2.60    | 3.49(2) |
| C(14)-H(14B)···O(10) | 0.96    | 2.52    | 3.46(3) |
| C(19)-H(19B)···O(31) | 0.97    | 2.49    | 3.21(2) |
| C(25)-H(25A)···O(34) | 0.97    | 2.51    | 3.46(3) |
| C(26)-H(26B)···O(38) | 0.95    | 2.45    | 3.35(3) |
| C(26)-H(26C)···O(16) | 0.96    | 2.49    | 3.22(3) |
| C(29)-H(29B)···O(16) | 0.97    | 2.43    | 3.39(3) |

|                      |      |      |         |
|----------------------|------|------|---------|
| C(32)-H(32A)···O(12) | 0.96 | 2.50 | 3.43(3) |
|----------------------|------|------|---------|

Intramolecular hydrogen bonding in the stacking structure of complex **9**

| Donor-H···Acceptor   | D-H (Å) | H-A (Å) | D-A (Å) |
|----------------------|---------|---------|---------|
| C(7)-H(7B)···O(56)   | 0.97    | 2.50    | 3.21(2) |
| C(17)-H(17A)···O(58) | 0.97    | 2.54    | 3.46(3) |
| C(23)-H(23A)···O(59) | 0.97    | 2.54    | 2.90(2) |
| C(25)-H(25B)···O(57) | 0.97    | 2.58    | 2.95(2) |
| C(27)-H(27A)···O(60) | 0.97    | 2.59    | 3.02(3) |

Table S11. Weak interactions in the stacking structure of complex **10**

Intermolecular hydrogen bonds in the stacking structure of complex **10**

| Donor-H···Acceptor   | D-H (Å) | H-A (Å) | D-A (Å) |
|----------------------|---------|---------|---------|
| O(19)-H(19E)···N(1)  | 0.85    | 1.98    | 2.81(2) |
| O(19)-H(19F)···O(28) | 0.85    | 2.04    | 2.87(2) |
| C(1)-H(1B)···O(58)   | 0.97    | 2.54    | 3.39(2) |
| C(2)-H(2A)···O(63)   | 0.97    | 2.59    | 3.36(2) |
| C(2)-H(2B)···O(36)   | 0.97    | 2.42    | 3.35(2) |
| C(10)-H(10B)···O(41) | 0.96    | 2.58    | 3.46(3) |
| C(14)-H(14B)···O(30) | 0.96    | 2.58    | 3.45(3) |
| C(19)-H(19B)···O(53) | 0.97    | 2.47    | 3.22(2) |
| C(23)-H(23A)···O(57) | 0.97    | 2.58    | 2.99(2) |
| C(24)-H(24B)···O(63) | 0.96    | 2.41    | 3.36(3) |
| C(25)-H(25B)···O(41) | 0.97    | 2.56    | 3.26(2) |
| C(27)-H(27B)···O(33) | 0.97    | 2.51    | 3.44(3) |
| C(32)-H(32B)···O(33) | 0.96    | 2.52    | 3.39(3) |

Intramolecular hydrogen bonding in the stacking structure of complex **10**

| Donor-H···Acceptor   | D-H (Å) | H-A (Å) | D-A (Å) |
|----------------------|---------|---------|---------|
| C(3)-H(3B)···O(12)   | 0.97    | 2.52    | 3.23(2) |
| C(23)-H(23B)···O(13) | 0.97    | 2.58    | 2.99(2) |
| C(25)-H(25A)···O(14) | 0.97    | 2.54    | 2.88(2) |
